CORRECTION

# Correction: Thermodynamics of Random Reaction Networks

The *PLOS ONE* Staff

## Notice of Republication

This article was republished on April 27, 2015, to correct errors in figures that were introduced during the typesetting process. The publisher apologizes for the errors. Please download this article again to view the correct version. The originally published, uncorrected article and the republished, corrected article are provided here for reference.

Please note that the republication addresses the issues in the correction posted on April 8, 2015.

## Supporting Information

**S1 File. Originally published, uncorrected article.**  
(PDF)

**S2 File. Republished corrected article.**  
(PDF)

## Reference

1. Fischer J, Kleidon A, Dittrich P (2015) Thermodynamics of Random Reaction Networks. *PLoS ONE* 10 (2): e0117312. doi:[10.1371/journal.pone.0117312](https://doi.org/10.1371/journal.pone.0117312) PMID: [25723751](https://pubmed.ncbi.nlm.nih.gov/25723751/)

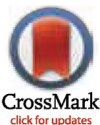

## OPEN ACCESS

**Citation:** The *PLOS ONE* Staff (2015) Correction: Thermodynamics of Random Reaction Networks. *PLoS ONE* 10(5): e0128260. doi:[10.1371/journal.pone.0128260](https://doi.org/10.1371/journal.pone.0128260)

**Published:** May 8, 2015

**Copyright:** © 2015 The PLOS ONE Staff. This is an open access article distributed under the terms of the [Creative Commons Attribution License](https://creativecommons.org/licenses/by/4.0/), which permits unrestricted use, distribution, and reproduction in any medium, provided the original author and source are credited.
